# Supplementary material for: Use and validity of child neurodevelopment outcome measures in studies on prenatal exposure to psychotropic and analgesic medications – A systematic review
Source: PLOS journal article supplement (doi:10.1371/journal.pone.0219778), 2019-07-11
Supplement: S5 (10.1371/journal.pone.0219778.s005) [file journal.pone.0219778.s005]

**S2 Table. Study characteristics, papers on psychotropics except for antidepressants.**

| Reference                                        | Country/setting                                               | Study design           | Exposure/<br>duration                                                   | Outcome/assessor<br><i>Name of the scale</i>                      | Sample<br>size/exposed | Effect estimate, Exposed/unexposed<br>Adjusted effect estimates where available                                                                                                                                                                                                                      | Cohen's d*                                   |
|--------------------------------------------------|---------------------------------------------------------------|------------------------|-------------------------------------------------------------------------|-------------------------------------------------------------------|------------------------|------------------------------------------------------------------------------------------------------------------------------------------------------------------------------------------------------------------------------------------------------------------------------------------------------|----------------------------------------------|
| <b>Assessment using psychometric instruments</b> |                                                               |                        |                                                                         |                                                                   |                        |                                                                                                                                                                                                                                                                                                      |                                              |
| <b>i. Assessment by health care professional</b> |                                                               |                        |                                                                         |                                                                   |                        |                                                                                                                                                                                                                                                                                                      |                                              |
| <i>Infant (&lt;2 years)</i>                      |                                                               |                        |                                                                         |                                                                   |                        |                                                                                                                                                                                                                                                                                                      |                                              |
| Platt 1989 [114]                                 | USA/Collaborative Perinatal Project                           | Cohort                 | Antipsychotic/<br>long term (more<br>than 2 months)                     | Motor skills<br><i>/BSID</i>                                      | 308/not<br>reported    | Percentage with failures on motor assessment<br><i>Gross motor</i><br>82.5%/69.8%<br><i>Fine motor</i><br>Not reported                                                                                                                                                                               | -†                                           |
| Peng 2013 [113]                                  | China/ Second Xiang-ya Hospital                               | Cohort                 | Antipsychotics/<br>throughout pregnancy                                 | General development/ <i>BSID-III</i>                              | 152/76                 | Mean (SD)<br><i>Motor scale</i><br>101.59 (8.53)/103.68 (7.19)<br><i>Cognitive scale</i><br>100.99 (8.17)/103.11 (7.84)<br><i>Language scale</i><br>97.26 (6.79)/98.18 (7.18)<br><i>Adaptive scale</i><br>99.80 (8.56)/101.24 (5.83)<br><i>Social-emotional scale</i><br>102.54 (9.72)/104.50 (8.63) | -0.26<br>-0.26<br>-0.13<br>-0.20<br>-0.26    |
| Johnson 2012 [73]                                | USA/ Emory Women's Mental Health Program and community cohort | Cohort                 | Antipsychotics/<br>any (median 32 weeks)                                | Motor skills<br><i>/Infant Neurological International Battery</i> | 97/21                  | Mean (SE)<br>63.86 (1.78)/70.12 (1.03)                                                                                                                                                                                                                                                               | -0.71                                        |
| Mortensen 2003 [81]                              | Denmark/ National Health Service in North Jutland County      | Cohort, registry based | Antipsychotics/<br>any duration<br><br>Benzodiazepines/<br>any duration | Motor skills<br><i>/ Boel test</i>                                | 818/63<br><br>837/82   | OR (95% CI) of abnormal test result<br>Antipsychotics<br>4.1 (1.3 to 13.0)<br>Benzodiazepines<br>7.7 (3.0 to 19.3)                                                                                                                                                                                   | 0.78 <sup>High</sup><br>1.13 <sup>High</sup> |

|                      |                                                                                                           |        |                                                                                                   |                                                                                                                      |       |                                                                                                                                                                                       |                                                                                                               |
|----------------------|-----------------------------------------------------------------------------------------------------------|--------|---------------------------------------------------------------------------------------------------|----------------------------------------------------------------------------------------------------------------------|-------|---------------------------------------------------------------------------------------------------------------------------------------------------------------------------------------|---------------------------------------------------------------------------------------------------------------|
| Oberlander 2004 [87] | Canada/ Reproductive mental health program at British Columbia Women's Hospital                           | Cohort | Clonazepam in combination with SSRI/mean duration 81 to 127 days compared to exposed to SSRI only | Cognition/ <i>BSID-II</i>                                                                                            | 46/18 | Mean (SD)<br><i>Motor skills</i><br><br>93.1 (8.6)/91.5 (9.6)<br><i>Mental development</i><br>97.2 (4.5)/100.7 (6.4)                                                                  | 0.17<br><br><br>-0.61                                                                                         |
| Reebye 2002 [92]     | Canada/ Children's and Women's Health Centre of British Columbia                                          | Cohort | Clonazepam in combination with SSRI/any duration compared to exposed to SSRI only                 | Overall development/ <i>BSID-II</i>                                                                                  | 38/14 | Mean (SD)<br><i>Motor skills</i><br><br>102 (6.3)/106 (5.4)<br><i>Mental development</i><br>93 (5.1)/98 (8.1)                                                                         | -0.70<br><br><br>-0.70                                                                                        |
| Reebye 2012 [38]     | Canada/ Reproductive Mental Health Program at St. Paul's Hospital and British Columbia's Women's Hospital | Cohort | Clonazepam in combination with SSRI/throughout pregnancy compared to exposed to SSRI only         | Overall development/ <i>BSID-II</i>                                                                                  | 37/15 | Mean (SD)<br><i>Motor skills</i><br><br>93 (8.6)/91 (9.5)<br><i>Mental development</i><br>97 (47.5)/100 (6.1)                                                                         | 0.22<br><br><br>-0.54                                                                                         |
| Viggedal 1993 [40]   | Sweden/Gothen-burg cohort                                                                                 | Cohort | Benzodiazepines/more than 5 DDD in early pregnancy (not further specified)                        | General development/ <i>Griffiths' mental development scale I</i><br>Behaviour/ <i>Neuropsychological assessment</i> | 41/16 | Mean (SD)<br>101.7 (7.9)/107.6 (8.3)<br><br>Percentage with hyperactive [inactive] symptoms<br>31% [19%]/16% [4%]<br>Percentage with short [long] attention span<br>31% [19%]/8% [4%] | -0.72<br><br>0.36 <sup>High</sup><br>[0.45] <sup>High</sup><br>0.58 <sup>High</sup><br>[0.45] <sup>High</sup> |
| Gidai 2008a [105]    | Hungary/Korányi Hospital                                                                                  | Cohort | Alprazolam/ high doses used for suicide attempt versus unexposed siblings                         | Cognition/ <i>Hungarian development test</i><br>Behaviour/ <i>Behavioural style questionnaire</i>                    | 20/9  | Mean (SD)<br>96.7 (6.2)/97.3 (6.1)<br>Percentage with behavioural deviation<br>11%/27%                                                                                                | -0.10<br><br>-0.43 <sup>High</sup>                                                                            |
| Gidai 2008b [106]    | Hungary/Korányi Hospital                                                                                  | Cohort | Medazepam/ high doses used for suicide attempt versus unexposed                                   | Cognition/ <i>Hungarian development test</i><br>Behaviour/ <i>Behavioural style questionnaire</i>                    | 19/9  | Mean (SD)<br>100.0 (1.0)/98.5 (4.7)<br>Percentage with behavioural deviation<br>22%/10%                                                                                               | 0.43<br><br>0.33 <sup>High</sup>                                                                              |

|                        |                          |        |                                                                                   |                                                                                                   |                |                                                                                                                                                                                                  |                                                                  |
|------------------------|--------------------------|--------|-----------------------------------------------------------------------------------|---------------------------------------------------------------------------------------------------|----------------|--------------------------------------------------------------------------------------------------------------------------------------------------------------------------------------------------|------------------------------------------------------------------|
|                        |                          |        | siblings                                                                          |                                                                                                   |                |                                                                                                                                                                                                  |                                                                  |
| Gidai 2008c [107]      | Hungary/Korányi Hospital | Cohort | Chlordiazepoxide/high doses used for suicide attempt versus unexposed siblings    | Cognition/ <i>Hungarian development test</i><br>Behaviour/ <i>Behavioural style questionnaire</i> | 52/31          | Mean (SD)<br>101.4 (9.8)/95.0 (2.0)<br>Percentage with behavioural deviation<br>19%/24%                                                                                                          | 0.83<br>-0.11 <sup>High</sup>                                    |
| Timmermann 2008b [112] | Hungary/Korányi Hospital | Cohort | Meprobamate/high doses used for suicide attempt compared to unexposed siblings    | Cognition/ <i>Hungarian development test</i><br>Behaviour/ <i>Behavioural style questionnaire</i> | 56/31<br>54/31 | Mean (SD)<br>99.2 (8.1)/97.8 (8.8)<br>Percentage with behavioural deviation<br>26%/22%                                                                                                           | 0.17<br>0.10 <sup>High</sup>                                     |
| Laegreid 1992 [108]    | Sweden/Gothenburg cohort | Cohort | Benzodiazepines/regular use (not defined further)                                 | Motor skills<br>/<br><i>Touwen Neurologic Assessment</i><br><i>Clinical neurologic assessment</i> | 42/16          | Mean (SD)<br><i>Posture and motility</i><br>69.56 (5.03)/72.92 (2.08)<br>Percentage with slow [stereotyped] movements<br>31% [13%]/4% [0%]<br>Percentage with normal walking pattern<br>63%/100% | -0.96<br>0.71 <sup>High</sup><br>[0.48] <sup>High</sup><br>-0.98 |
| Petik 2008a [115]      | Hungary/Korányi Hospital | Cohort | Glutethimide/high doses used for suicide attempt compared to unexposed siblings   | Cognition/ <i>Hungarian development test</i><br>Behaviour/ <i>Behavioural style questionnaire</i> | 26/14<br>22/12 | Mean (SD)<br>100.4 (10.8)/98.8 (9.6)<br>Percentage with behavioural deviation<br>33%/30%                                                                                                         | 0.16<br>0.07 <sup>High</sup>                                     |
| Petik 2008b [116]      | Hungary/Korányi Hospital | Cohort | Amobarbital/high doses used for suicide attempt compared to unexposed siblings    | Cognition/ <i>Hungarian development test</i><br>Behaviour/ <i>Behavioural style questionnaire</i> | 21/11<br>13/8  | Mean (SD)<br>96.4 (8.4)/100.0 (12.2)<br>Percentage with behavioural deviation<br>40%/60%                                                                                                         | -0.35<br>-0.46 <sup>High</sup>                                   |
| Timmermann 2008a [117] | Hungary/Korányi Hospital | Cohort | Barbital, hexobarbital, butobarbital/high doses used for suicide attempt compared | Cognition/ <i>Hungarian development test</i>                                                      | 8/5<br>8/4     | Mean (SD)<br>Barbital<br>90.8 (18.8)/95.0 (8.7)<br>Hexobarbital<br>92.5 (8.7)/96.3 (7.5)                                                                                                         | -0.26<br>-0.47                                                   |

|                                         |                                                                            |                             |                                                                                                   |                                                                |                     |                                                                                    |                       |
|-----------------------------------------|----------------------------------------------------------------------------|-----------------------------|---------------------------------------------------------------------------------------------------|----------------------------------------------------------------|---------------------|------------------------------------------------------------------------------------|-----------------------|
|                                         |                                                                            |                             | to unexposed<br>siblings                                                                          |                                                                | 6/3                 | Butobarbital<br>100.0 (0)/ 100.0 (0)                                               | undefined             |
|                                         |                                                                            |                             |                                                                                                   | Behaviour/ <i>Behavioural<br/>style questionnaire</i>          | 5/3                 | Percentage with behavioural deviation<br>Barbital<br>33%/100%                      | -2.24 <sup>High</sup> |
|                                         |                                                                            |                             |                                                                                                   |                                                                | 8/4                 | Hexobarbital<br>25%/25%                                                            | 0.00 <sup>High</sup>  |
|                                         |                                                                            |                             |                                                                                                   |                                                                | 6/3                 | Butobarbital<br>33%/66%                                                            | -0.71 <sup>High</sup> |
| <b><i>Preschool (2-5 years)</i></b>     |                                                                            |                             |                                                                                                   |                                                                |                     |                                                                                    |                       |
| Hurault-Delarue<br>2016 [69]            | France/<br>EFEMERIS database                                               | Cohort, reg-<br>istry based | Antipsychotics/<br>any in 2 <sup>nd</sup> or 3 <sup>rd</sup><br>trimester                         | Overall develop-<br>ment/ <i>Compulsory medi-<br/>cal exam</i> | 32 373/70           | Percentage with delayed development<br>Antipsychotics<br><i>Motor</i><br>2.1%/0.4% | 0.10 <sup>High</sup>  |
|                                         |                                                                            |                             |                                                                                                   |                                                                |                     | <i>Mental</i><br>2.1%/1.0%                                                         | 0.06 <sup>High</sup>  |
|                                         |                                                                            |                             | Anxiolytics, in-<br>cluding hypnot-<br>ics/any in 2 <sup>nd</sup> or<br>3 <sup>rd</sup> trimester |                                                                | 32 303/28<br>1      | Anxiolytics<br><i>Motor</i><br>1.7%/0.4%                                           | 0.08 <sup>High</sup>  |
|                                         |                                                                            |                             |                                                                                                   |                                                                |                     | <i>Mental</i><br>1.7%/1.0%                                                         | 0.04 <sup>High</sup>  |
| Schechter 2017<br>[94]                  | USA/ Emory Wom-<br>en's Mental Health<br>Program and commu-<br>nity cohort | Cohort                      | Antipsychotics/<br>any duration                                                                   | Cognition/ <i>DAS</i>                                          | 162/not<br>reported | Pearson correlation<br>Antipsychotics<br>-0.09                                     | -†                    |
|                                         |                                                                            |                             | Anxiolytics/<br>any duration                                                                      |                                                                |                     | Anxiolytics<br>-0.19                                                               |                       |
|                                         |                                                                            |                             | Hypnotics/<br>any duration                                                                        |                                                                |                     | Hypnotics<br>-0.04                                                                 |                       |
| Hartz 1975 [35]                         | USA/Collaborative<br>Perinatal Project                                     | Cohort                      | Meprobamate,<br>chlordiazepox-<br>ide/any duration                                                | Cognition/ <i>Stanford<br/>Binet Intelligence Scale</i>        | 28 453/69<br>4      | Mean<br>Meprobamate<br>96.7/96.9                                                   | -†                    |
|                                         |                                                                            |                             |                                                                                                   |                                                                | 28 453/43<br>5      | Chlordiazepoxide<br>96.7/96.9                                                      |                       |
| <b><i>School child (6-12 years)</i></b> |                                                                            |                             |                                                                                                   |                                                                |                     |                                                                                    |                       |
| Platt 1989 [114]                        | USA/Collaborative                                                          | Cohort                      | Antipsychotic/                                                                                    | Motor skills                                                   | 308/not             | Not reported, as only statistically signifi-                                       | -†                    |

| Perinatal Project                |                                                                    |        | long term (more than 2 months)                                                             | /Paediatric neurologic assessment                           | reported | cant results are reported.                                                                                                                                                                                                                                                                                                                     |                                                                                                                                                                                                                                                                                                                                                                                                                                                                                                                                                                                                                                                                                                                                                                                                                                                                                                                                                                                                                                                                                                                                                                                                                                                                                                                                                                                                                                                                                                                                                                                                                                                                                                                                                                                                                                                                                                                                                                                                                                                                                                                                                                                                                                                                                                                                                                                                                                                                                                                                                                                                                                                                                                                                                                                                                                                                                                                                                                                                                                                                                                                                                                                                                                                                                                                                                                                                                                                                                                                                                                                                                                                                                                                                                                                                                                                                                                                                                                                                                                                                                                                                                                                                                                                                                                                                                                                                                                                                                                                                                                                                                                                                                                                                                                                                                                                                                                                                                                                                                                                                                                                                                                                                                                                                                                                                                                                                                                                                                                                                                                                                                                                                                                                                                                                                                                                                                                                                                                                                                                                                                                                                                                                                                                                                                                                                                                                                                                                                                                                                                                                                                                                                                                                                                                                                                                                                                                                                                                                                                                                                                                                                                                                                                                                                                                                                                                                                                                                                                                                                                                                                                                                                                                                                                                                                                                                                                                                                                                                                                                                                                                                                                                                                                                                                                                                                                                                                                                                                                                                                                                                                                                                                                                                                                                                                                                                                                                                                                                                                                                                                                                                                                                                                                                                                                                                                                                                                                                                                                                                                                                                                                                                                                                                                                                                                                                                                                                                                                                                                                                                                                                                                                                                                                    |
|----------------------------------|--------------------------------------------------------------------|--------|--------------------------------------------------------------------------------------------|-------------------------------------------------------------|----------|------------------------------------------------------------------------------------------------------------------------------------------------------------------------------------------------------------------------------------------------------------------------------------------------------------------------------------------------|--------------------------------------------------------------------------------------------------------------------------------------------------------------------------------------------------------------------------------------------------------------------------------------------------------------------------------------------------------------------------------------------------------------------------------------------------------------------------------------------------------------------------------------------------------------------------------------------------------------------------------------------------------------------------------------------------------------------------------------------------------------------------------------------------------------------------------------------------------------------------------------------------------------------------------------------------------------------------------------------------------------------------------------------------------------------------------------------------------------------------------------------------------------------------------------------------------------------------------------------------------------------------------------------------------------------------------------------------------------------------------------------------------------------------------------------------------------------------------------------------------------------------------------------------------------------------------------------------------------------------------------------------------------------------------------------------------------------------------------------------------------------------------------------------------------------------------------------------------------------------------------------------------------------------------------------------------------------------------------------------------------------------------------------------------------------------------------------------------------------------------------------------------------------------------------------------------------------------------------------------------------------------------------------------------------------------------------------------------------------------------------------------------------------------------------------------------------------------------------------------------------------------------------------------------------------------------------------------------------------------------------------------------------------------------------------------------------------------------------------------------------------------------------------------------------------------------------------------------------------------------------------------------------------------------------------------------------------------------------------------------------------------------------------------------------------------------------------------------------------------------------------------------------------------------------------------------------------------------------------------------------------------------------------------------------------------------------------------------------------------------------------------------------------------------------------------------------------------------------------------------------------------------------------------------------------------------------------------------------------------------------------------------------------------------------------------------------------------------------------------------------------------------------------------------------------------------------------------------------------------------------------------------------------------------------------------------------------------------------------------------------------------------------------------------------------------------------------------------------------------------------------------------------------------------------------------------------------------------------------------------------------------------------------------------------------------------------------------------------------------------------------------------------------------------------------------------------------------------------------------------------------------------------------------------------------------------------------------------------------------------------------------------------------------------------------------------------------------------------------------------------------------------------------------------------------------------------------------------------------------------------------------------------------------------------------------------------------------------------------------------------------------------------------------------------------------------------------------------------------------------------------------------------------------------------------------------------------------------------------------------------------------------------------------------------------------------------------------------------------------------------------------------------------------------------------------------------------------------------------------------------------------------------------------------------------------------------------------------------------------------------------------------------------------------------------------------------------------------------------------------------------------------------------------------------------------------------------------------------------------------------------------------------------------------------------------------------------------------------------------------------------------------------------------------------------------------------------------------------------------------------------------------------------------------------------------------------------------------------------------------------------------------------------------------------------------------------------------------------------------------------------------------------------------------------------------------------------------------------------------------------------------------------------------------------------------------------------------------------------------------------------------------------------------------------------------------------------------------------------------------------------------------------------------------------------------------------------------------------------------------------------------------------------------------------------------------------------------------------------------------------------------------------------------------------------------------------------------------------------------------------------------------------------------------------------------------------------------------------------------------------------------------------------------------------------------------------------------------------------------------------------------------------------------------------------------------------------------------------------------------------------------------------------------------------------------------------------------------------------------------------------------------------------------------------------------------------------------------------------------------------------------------------------------------------------------------------------------------------------------------------------------------------------------------------------------------------------------------------------------------------------------------------------------------------------------------------------------------------------------------------------------------------------------------------------------------------------------------------------------------------------------------------------------------------------------------------------------------------------------------------------------------------------------------------------------------------------------------------------------------------------------------------------------------------------------------------------------------------------------------------------------------------------------------------------------------------------------------------------------------------------------------------------------------------------------------------------------------------------------------------------------------------------------------------------------------------------------------------------------------------------------------------------------------------------------------------------------------------------------------------------------------------------------------------------------------------------------------------------------------------------------------------------------------------------------------------------------------------------------------------------------------------------------------------------------------------------------------------------------------------------------------------------------------------------------------------------------------------------------------------------------------------------------------------------------------------------------------------------------------------------------------------------------------------------------------------------------------------------------------------------------------------------------------------------------------------------------------------------------------------------------------------------------------------------------------------------------------------------------------------------------------------------------------------------------------------------|
| <b>Adolescent (13-18 years)</b>  |                                                                    |        |                                                                                            |                                                             |          |                                                                                                                                                                                                                                                                                                                                                |                                                                                                                                                                                                                                                                                                                                                                                                                                                                                                                                                                                                                                                                                                                                                                                                                                                                                                                                                                                                                                                                                                                                                                                                                                                                                                                                                                                                                                                                                                                                                                                                                                                                                                                                                                                                                                                                                                                                                                                                                                                                                                                                                                                                                                                                                                                                                                                                                                                                                                                                                                                                                                                                                                                                                                                                                                                                                                                                                                                                                                                                                                                                                                                                                                                                                                                                                                                                                                                                                                                                                                                                                                                                                                                                                                                                                                                                                                                                                                                                                                                                                                                                                                                                                                                                                                                                                                                                                                                                                                                                                                                                                                                                                                                                                                                                                                                                                                                                                                                                                                                                                                                                                                                                                                                                                                                                                                                                                                                                                                                                                                                                                                                                                                                                                                                                                                                                                                                                                                                                                                                                                                                                                                                                                                                                                                                                                                                                                                                                                                                                                                                                                                                                                                                                                                                                                                                                                                                                                                                                                                                                                                                                                                                                                                                                                                                                                                                                                                                                                                                                                                                                                                                                                                                                                                                                                                                                                                                                                                                                                                                                                                                                                                                                                                                                                                                                                                                                                                                                                                                                                                                                                                                                                                                                                                                                                                                                                                                                                                                                                                                                                                                                                                                                                                                                                                                                                                                                                                                                                                                                                                                                                                                                                                                                                                                                                                                                                                                                                                                                                                                                                                                                                                                                                    |
| Mattson 2002 [79]                | USA/ California TIS and Clinical Research Program                  | Cohort | Benzodiazepi- nes/at least one 1 <sup>st</sup> trimester exposure                          | Cognition/<br><i>WISC-III</i>                               | 107/25   | Mean<br>100.2/105.7                                                                                                                                                                                                                                                                                                                            | -†                                                                                                                                                                                                                                                                                                                                                                                                                                                                                                                                                                                                                                                                                                                                                                                                                                                                                                                                                                                                                                                                                                                                                                                                                                                                                                                                                                                                                                                                                                                                                                                                                                                                                                                                                                                                                                                                                                                                                                                                                                                                                                                                                                                                                                                                                                                                                                                                                                                                                                                                                                                                                                                                                                                                                                                                                                                                                                                                                                                                                                                                                                                                                                                                                                                                                                                                                                                                                                                                                                                                                                                                                                                                                                                                                                                                                                                                                                                                                                                                                                                                                                                                                                                                                                                                                                                                                                                                                                                                                                                                                                                                                                                                                                                                                                                                                                                                                                                                                                                                                                                                                                                                                                                                                                                                                                                                                                                                                                                                                                                                                                                                                                                                                                                                                                                                                                                                                                                                                                                                                                                                                                                                                                                                                                                                                                                                                                                                                                                                                                                                                                                                                                                                                                                                                                                                                                                                                                                                                                                                                                                                                                                                                                                                                                                                                                                                                                                                                                                                                                                                                                                                                                                                                                                                                                                                                                                                                                                                                                                                                                                                                                                                                                                                                                                                                                                                                                                                                                                                                                                                                                                                                                                                                                                                                                                                                                                                                                                                                                                                                                                                                                                                                                                                                                                                                                                                                                                                                                                                                                                                                                                                                                                                                                                                                                                                                                                                                                                                                                                                                                                                                                                                                                                                                 |
| <b>ii. Assessment by parents</b> |                                                                    |        |                                                                                            |                                                             |          |                                                                                                                                                                                                                                                                                                                                                |                                                                                                                                                                                                                                                                                                                                                                                                                                                                                                                                                                                                                                                                                                                                                                                                                                                                                                                                                                                                                                                                                                                                                                                                                                                                                                                                                                                                                                                                                                                                                                                                                                                                                                                                                                                                                                                                                                                                                                                                                                                                                                                                                                                                                                                                                                                                                                                                                                                                                                                                                                                                                                                                                                                                                                                                                                                                                                                                                                                                                                                                                                                                                                                                                                                                                                                                                                                                                                                                                                                                                                                                                                                                                                                                                                                                                                                                                                                                                                                                                                                                                                                                                                                                                                                                                                                                                                                                                                                                                                                                                                                                                                                                                                                                                                                                                                                                                                                                                                                                                                                                                                                                                                                                                                                                                                                                                                                                                                                                                                                                                                                                                                                                                                                                                                                                                                                                                                                                                                                                                                                                                                                                                                                                                                                                                                                                                                                                                                                                                                                                                                                                                                                                                                                                                                                                                                                                                                                                                                                                                                                                                                                                                                                                                                                                                                                                                                                                                                                                                                                                                                                                                                                                                                                                                                                                                                                                                                                                                                                                                                                                                                                                                                                                                                                                                                                                                                                                                                                                                                                                                                                                                                                                                                                                                                                                                                                                                                                                                                                                                                                                                                                                                                                                                                                                                                                                                                                                                                                                                                                                                                                                                                                                                                                                                                                                                                                                                                                                                                                                                                                                                                                                                                                                                    |
| <b>Infant (&lt;2 years)</b>      |                                                                    |        |                                                                                            |                                                             |          |                                                                                                                                                                                                                                                                                                                                                |                                                                                                                                                                                                                                                                                                                                                                                                                                                                                                                                                                                                                                                                                                                                                                                                                                                                                                                                                                                                                                                                                                                                                                                                                                                                                                                                                                                                                                                                                                                                                                                                                                                                                                                                                                                                                                                                                                                                                                                                                                                                                                                                                                                                                                                                                                                                                                                                                                                                                                                                                                                                                                                                                                                                                                                                                                                                                                                                                                                                                                                                                                                                                                                                                                                                                                                                                                                                                                                                                                                                                                                                                                                                                                                                                                                                                                                                                                                                                                                                                                                                                                                                                                                                                                                                                                                                                                                                                                                                                                                                                                                                                                                                                                                                                                                                                                                                                                                                                                                                                                                                                                                                                                                                                                                                                                                                                                                                                                                                                                                                                                                                                                                                                                                                                                                                                                                                                                                                                                                                                                                                                                                                                                                                                                                                                                                                                                                                                                                                                                                                                                                                                                                                                                                                                                                                                                                                                                                                                                                                                                                                                                                                                                                                                                                                                                                                                                                                                                                                                                                                                                                                                                                                                                                                                                                                                                                                                                                                                                                                                                                                                                                                                                                                                                                                                                                                                                                                                                                                                                                                                                                                                                                                                                                                                                                                                                                                                                                                                                                                                                                                                                                                                                                                                                                                                                                                                                                                                                                                                                                                                                                                                                                                                                                                                                                                                                                                                                                                                                                                                                                                                                                                                                                                                    |
| Reebye 2002 [92]                 | Canada/ Children’s and Women’s Health Centre of British Co- lumbia | Cohort | Clonazepam in combination with SSRI/any duration compared to ex- posed to SSRI only        | Behaviour/ <i>Early Infancy Temperament Question- naire</i> | 38/14    | Percentage with difficult temperament<br>31%/0%                                                                                                                                                                                                                                                                                                | 0.80 <sup>High</sup>                                                                                                                                                                                                                                                                                                                                                                                                                                                                                                                                                                                                                                                                                                                                                                                                                                                                                                                                                                                                                                                                                                                                                                                                                                                                                                                                                                                                                                                                                                                                                                                                                                                                                                                                                                                                                                                                                                                                                                                                                                                                                                                                                                                                                                                                                                                                                                                                                                                                                                                                                                                                                                                                                                                                                                                                                                                                                                                                                                                                                                                                                                                                                                                                                                                                                                                                                                                                                                                                                                                                                                                                                                                                                                                                                                                                                                                                                                                                                                                                                                                                                                                                                                                                                                                                                                                                                                                                                                                                                                                                                                                                                                                                                                                                                                                                                                                                                                                                                                                                                                                                                                                                                                                                                                                                                                                                                                                                                                                                                                                                                                                                                                                                                                                                                                                                                                                                                                                                                                                                                                                                                                                                                                                                                                                                                                                                                                                                                                                                                                                                                                                                                                                                                                                                                                                                                                                                                                                                                                                                                                                                                                                                                                                                                                                                                                                                                                                                                                                                                                                                                                                                                                                                                                                                                                                                                                                                                                                                                                                                                                                                                                                                                                                                                                                                                                                                                                                                                                                                                                                                                                                                                                                                                                                                                                                                                                                                                                                                                                                                                                                                                                                                                                                                                                                                                                                                                                                                                                                                                                                                                                                                                                                                                                                                                                                                                                                                                                                                                                                                                                                                                                                                                                                               |
| <b>Preschool (2-5 years)</b>     |                                                                    |        |                                                                                            |                                                             |          |                                                                                                                                                                                                                                                                                                                                                |                                                                                                                                                                                                                                                                                                                                                                                                                                                                                                                                                                                                                                                                                                                                                                                                                                                                                                                                                                                                                                                                                                                                                                                                                                                                                                                                                                                                                                                                                                                                                                                                                                                                                                                                                                                                                                                                                                                                                                                                                                                                                                                                                                                                                                                                                                                                                                                                                                                                                                                                                                                                                                                                                                                                                                                                                                                                                                                                                                                                                                                                                                                                                                                                                                                                                                                                                                                                                                                                                                                                                                                                                                                                                                                                                                                                                                                                                                                                                                                                                                                                                                                                                                                                                                                                                                                                                                                                                                                                                                                                                                                                                                                                                                                                                                                                                                                                                                                                                                                                                                                                                                                                                                                                                                                                                                                                                                                                                                                                                                                                                                                                                                                                                                                                                                                                                                                                                                                                                                                                                                                                                                                                                                                                                                                                                                                                                                                                                                                                                                                                                                                                                                                                                                                                                                                                                                                                                                                                                                                                                                                                                                                                                                                                                                                                                                                                                                                                                                                                                                                                                                                                                                                                                                                                                                                                                                                                                                                                                                                                                                                                                                                                                                                                                                                                                                                                                                                                                                                                                                                                                                                                                                                                                                                                                                                                                                                                                                                                                                                                                                                                                                                                                                                                                                                                                                                                                                                                                                                                                                                                                                                                                                                                                                                                                                                                                                                                                                                                                                                                                                                                                                                                                                                                                    |
| Lupattelli 2019 [109]            | Norway/MoBa                                                        | Cohort | Benzodiazepi- nes/any in mid- pregnancy (week 17-28) or late pregnancy (week 29 and later) | Motor skills/ <i>ASQ</i>                                    | 4 183/28 | Beta (95% CI)<br><i>Gross motor</i><br>Mid<br>-0.47 (-0.78 to -0.17)<br>Late<br>0.80 (0.12 to 1.48)<br><i>Fine motor</i><br>Mid<br>-0.30 (-0.76 to 0.15)<br>Late<br>0.74 (-0.12 to 1.60)<br><i>Communication</i><br>Mid<br>-0.15 (-0.43 to 0.13)<br>Late<br>0.06 (-0.16 to 0.27)<br><i>ADHD traits</i><br>Mid<br>-0.24 (-0.63 to 0.15)<br>Late | -0.57 <sup>High</sup><br><br><br><br><br><br><br><br><br><br><br><br><br><br><br><br><br><br><br><br><br><br><br><br><br><br><br><br><br><br><br><br><br><br><br><br><br><br><br><br><br><br><br><br><br><br><br><br><br><br><br><br><br><br><br><br><br><br><br><br><br><br><br><br><br><br><br><br><br><br><br><br><br><br><br><br><br><br><br><br><br><br><br><br><br><br><br><br><br><br><br><br><br><br><br><br><br><br><br><br><br><br><br><br><br><br><br><br><br><br><br><br><br><br><br><br><br><br><br><br><br><br><br><br><br><br><br><br><br><br><br><br><br><br><br><br><br><br><br><br><br><br><br><br><br><br><br><br><br><br><br><br><br><br><br><br><br><br><br><br><br><br><br><br><br><br><br><br><br><br><br><br><br><br><br><br><br><br><br><br><br><br><br><br><br><br><br><br><br><br><br><br><br><br><br><br><br><br><br><br><br><br><br><br><br><br><br><br><br><br><br><br><br><br><br><br><br><br><br><br><br><br><br><br><br><br><br><br><br><br><br><br><br><br><br><br><br><br><br><br><br><br><br><br><br><br><br><br><br><br><br><br><br><br><br><br><br><br><br><br><br><br><br><br><br><br><br><br><br><br><br><br><br><br><br><br><br><br><br><br><br><br><br><br><br><br><br><br><br><br><br><br><br><br><br><br><br><br><br><br><br><br><br><br><br><br><br><br><br><br><br><br><br><br><br><br><br><br><br><br><br><br><br><br><br><br><br><br><br><br><br><br><br><br><br><br><br><br><br><br><br><br><br><br><br><br><br><br><br><br><br><br><br><br><br><br><br><br><br><br><br><br><br><br><br><br><br><br><br><br><br><br><br><br><br><br><br><br><br><br><br><br><br><br><br><br><br><br><br><br><br><br><br><br><br><br><br><br><br><br><br><br><br><br><br><br><br><br><br><br><br><br><br><br><br><br><br><br><br><br><br><br><br><br><br><br><br><br><br><br><br><br><br><br><br><br><br><br><br><br><br><br><br><br><br><br><br><br><br><br><br><br><br><br><br><br><br><br><br><br><br><br><br><br><br><br><br><br><br><br><br><br><br><br><br><br><br><br><br><br><br><br><br><br><br><br><br><br><br><br><br><br><br><br><br><br><br><br><br><br><br><br><br><br><br><br><br><br><br><br><br><br><br><br><br><br><br><br><br><br><br><br><br><br><br><br><br><br><br><br><br><br><br><br><br><br><br><br><br><br><br><br><br><br><br><br><br><br><br><br><br><br><br><br><br><br><br><br><br><br><br><br><br><br><br><br><br><br><br><br><br><br><br><br><br><br><br><br><br><br><br><br><br><br><br><br><br><br><br><br><br><br><br><br><br><br><br><br><br><br><br><br><br><br><br><br><br><br><br><br><br><br><br><br><br><br><br><br><br><br><br><br><br><br><br><br><br><br><br><br><br><br><br><br><br><br><br><br><br><br><br><br><br><br><br><br><br><br><br><br><br><br><br><br><br><br><br><br><br><br><br><br><br><br><br><br><br><br><br><br><br><br><br><br><br><br><br><br><br><br><br><br><br><br><br><br><br><br><br><br><br><br><br><br><br><br><br><br><br><br><br><br><br><br><br><br><br><br><br><br><br><br><br><br><br><br><br><br><br><br><br><br><br><br><br><br><br><br><br><br><br><br><br><br><br><br><br><br><br><br><br><br><br><br><br><br><br><br><br><br><br><br><br><br><br><br><br><br><br><br><br><br><br><br><br><br><br><br><br><br><br><br><br><br><br><br><br><br><br><br><br><br><br><br><br><br><br><br><br><br><br><br><br><br><br><br><br><br><br><br><br><br><br><br><br><br><br><br><br><br><br><br><br><br><br><br><br><br><br><br><br><br><br><br><br><br><br><br><br><br><br><br><br><br><br><br><br><br><br><br><br><br><br><br><br><br><br><br><br><br><br><br><br><br><br><br><br><br><br><br><br><br><br><br><br><br><br><br><br><br><br><br><br><br><br><br><br><br><br><br><br><br><br><br><br><br><br><br><br><br><br><br><br><br><br><br><br><br><br><br><br><br><br><br><br><br><br><br><br><br><br><br><br><br><br><br><br><br><br><br><br><br><br><br><br><br><br><br><br><br><br><br><br><br><br><br><br><br><br><br><br><br><br><br><br><br><br><br><br><br><br><br><br><br><br><br><br><br><br><br><br><br><br><br><br><br><br><br><br><br><br><br><br><br><br><br><br><br><br><br><br><br><br><br><br><br><br><br><br><br><br><br><br><br><br><br><br><br><br><br><br><br><br><br><br><br><br><br><br><br><br><br><br><br><br><br><br><br><br><br><br><br><br><br><br><br><br><br><br><br><br><br><br><br><br><br><br><br><br><br><br><br><br><br><br><br><br><br><br><br><br><br><br><br><br><br><br><br><br><br><br><br><br><br><br><br><br><br><br><br><br><br><br><br><br><br><br><br><br><br><br><br><br><br><br><br><br><br><br><br><br><br><br><br><br><br><br><br><br><br><br><br><br><br><br><br><br><br><br><br><br><br><br><br><br><br><br><br><br><br><br><br><br><br><br><br><br><br><br><br><br><br><br><br><br><br><br><br><br><br><br><br><br><br><br><br><br><br><br><br><br><br><br><br><br><br><br><br><br><br><br><br><br><br><br><br><br><br><br><br><br><br><br><br><br><br><br><br><br><br><br><br><br><br><br><br><br><br><br><br><br><br><br><br><br><br><br><br><br><br><br><br><br><br><br><br><br><br><br><br><br><br><br><br><br><br><br><br><br><br><br><br><br><br><br><br><br><br><br><br><br><br><br><br><br><br><br><br><br><br><br><br><br><br><br><br><br><br><br><br><br><br><br><br><br><br><br><br><br><br><br><br><br><br><br><br><br><br><br><br><br><br><br><br><br><br><br><br><br><br><br><br><br><br><br><br><br><br><br><br><br><br><br><br><br><br><br><br><br><br><br><br><br><br><br><br><br><br><br><br><br><br><br><br><br><br><br><br><br><br><br><br><br><br><br><br><br><br><br><br><br><br><br><br><br><br><br><br><br><br><br><br><br><br><br><br><br><br><br><br><br><br><br><br><br><br><br><br><br><br><br><br><br><br><br><br><br><br><br><br><br><br><br><br><br><br><br><br><br><br><br><br><br><br><br><br><br><br><br><br><br><br><br><br><br><br><br><br><br><br><br><br><br><br><br><br><br><br><br><br><br><br><br><br><br><br><br><br><br><br><br><br><br><br><br><br><br><br><br><br><br><br><br><br><br><br><br><br><br><br><br><br><br><br><br><br><br><br><br><br><br><br><br><br><br><br><br><br><br><br><br><br><br><br><br><br><br><br><br><br><br><br><br><br><br><br><br><br><br><br><br><br><br><br><br><br><br><br><br><br><br><br><br><br><br><br><br><br><br><br><br><br><br><br><br><br><br><br><br><br><br><br><br><br><br><br><br><br><br><br><br><br><br><br><br><br><br><br><br><br><br><br><br><br><br><br><br><br><br><br><br><br><br><br><br><br><br><br><br><br><br><br><br><br><br><br><br><br><br><br><br><br><br><br><br><br><br><br><br><br><br><br><br><br><br><br><br><br><br><br><br><br><br><br><br><br><br><br><br><br><br><br><br><br><br><br><br><br><br><br><br><br><br><br><br><br><br><br><br><br><br><br><br><br><br><br><br><br><br><br><br><br><br><br><br><br><br><br><br><br><br><br><br><br><br><br><br><br><br><br><br><br><br><br><br><br><br><br><br><br><br><br><br><br><br><br><br><br><br><br><br><br><br><br><br><br><br><br><br><br><br><br><br><br><br><br><br><br><br><br><br><br><br><br><br><br><br><br><br><br><br><br><br><br><br><br><br><br><br><br><br><br><br><br><br><br><br><br><br><br><br><br><br><br><br><br><br><br><br><br><br><br><br><br><br><br><br><br><br><br><br><br><br><br><br><br><br><br><br><br><br><br><br><br><br><br><br><br><br><br><br><br><br><br><br><br><br><br><br><br><br><br><br><br><br><br><br><br><br><br><br><br><br><br><br><br><br><br><br><br><br><br><br><br><br><br><br><br><br><br><br><br><br><br><br><br><br><br><br><br><br><br><br><br><br><br><br><br><br><br><br><br><br><br><br><br><br><br><br><br><br><br><br><br><br><br><br><br><br><br><br><br><br><br><br><br><br><br><br><br><br><br><br><br><br><br><br><br><br><br><br><br><br><br><br><br><br><br><br><br><br><br><br><br><br><br><br><br><br><br><br><br><br><br><br><br><br><br><br><br><br><br><br><br><br><br><br><br><br><br><br><br><br><br><br><br><br><br><br><br><br><br><br><br><br><br><br><br><br><br><br><br><br><br><br><br><br><br><br><br><br><br><br><br><br><br><br><br><br><br><br><br><br><br><br><br><br><br><br><br><br><br><br><br><br><br><br><br><br><br><br><br><br><br><br><br><br><br><br><br><br><br><br><br><br><br><br><br><br><br><br><br><br><br><br><br><br><br><br><br><br><br><br><br><br><br><br><br><br><br><br><br><br><br><br><br><br><br><br><br><br><br><br><br><br><br><br><br><br><br><br><br><br><br><br><br><br><br><br><br><br><br><br><br><br><br><br><br><br><br><br><br><br><br><br><br><br><br><br><br><br><br><br><br><br><br><br><br><br><br><br><br><br><br><br><br><br><br><br><br><br><br><br><br><br><br><br><br><br><br><br><br><br><br><br><br><br><br><br><br><br><br><br><br><br><br><br><br><br><br><br><br><br><br><br><br><br><br><br><br><br><br><br><br><br><br><br><br><br><br><br><br><br><br><br><br><br><br><br><br><br><br><br><br><br><br><br><br><br><br><br><br><br><br><br><br><br><br><br><br><br><br><br><br><br><br><br><br><br><br><br><br><br><br><br><br><br><br><br><br><br><br><br><br><br><br><br><br><br><br><br><br><br><br><br><br><br><br><br><br><br><br><br><br><br><br><br><br><br><br><br><br><br><br><br><br><br><br><br><br><br><br><br><br><br><br><br><br><br><br><br><br><br><br><br><br><br><br><br><br><br><br><br><br><br><br><br><br><br><br><br><br><br><br><br><br><br><br><br><br><br><br><br><br><br><br><br><br><br><br><br><br><br><br><br><br><br><br><br><br><br><br><br><br><br><br><br><br><br><br><br><br><br><br><br><br><br><br><br><br><br><br><br><br><br><br><br><br><br><br><br><br><br><br><br><br><br><br><br><br><br><br><br><br><br><br><br><br><br><br><br><br><br><br><br><br><br><br><br><br><br><br><br><br><br><br><br><br><br><br><br><br><br><br><br><br><br><br><br><br><br><br><br><br><br><br><br><br><br><br><br><br><br><br><br><br><br><br><br><br><br><br><br><br><br><br><br><br><br><br><br><br><br><br><br><br><br><br><br><br><br><br><br><br><br><br><br><br><br><br><br><br><br><br><br><br><br><br><br><br><br><br><br><br><br><br><br><br><br><br><br><br><br><br><br><br><br><br><br><br><br><br><br><br><br><br><br><br><br><br><br><br><br><br><br><br><br><br><br><br><br><br><br><br><br><br><br>< |



|                                         |                                  |        |                                                          |                                                           |                |                                                                                                                 |                                                  |
|-----------------------------------------|----------------------------------|--------|----------------------------------------------------------|-----------------------------------------------------------|----------------|-----------------------------------------------------------------------------------------------------------------|--------------------------------------------------|
|                                         |                                  |        | only                                                     |                                                           |                | 58.44 (9.10)/54.92 (6.22)<br><i>Emotionally reactive</i>                                                        | 0.47 <sup>High</sup>                             |
|                                         |                                  |        |                                                          |                                                           |                | 61.00 (15.17)/55.08 (7.21)<br><i>Anxious/depressed</i>                                                          | 0.53 <sup>High</sup>                             |
|                                         |                                  |        |                                                          |                                                           |                | 59.11 (10.80)/56.46 (7.46)                                                                                      | 0.30 <sup>High</sup>                             |
| Odsbu 2015<br>[110]                     | Norway/MoBa                      | Cohort | Benzodiazepi-<br>nes/one period and<br>two/three periods | Language/<br><i>Language competence<br/>questionnaire</i> | 51 411/31<br>6 | OR (95%) of low language competence<br>One period<br>1.0 (0.7 to 1.3)<br>Two/three periods<br>1.3 (0.8 to 2.3)  | 0.00 <sup>High</sup><br><br>0.14 <sup>High</sup> |
| <b><i>School child (6-12 years)</i></b> |                                  |        |                                                          |                                                           |                |                                                                                                                 |                                                  |
| Radojčić 2017<br>[111]                  | The Netherlands/<br>Generation R | Cohort | Benzodiazepi-<br>nes/any                                 | Behaviour/ <i>CBCL</i>                                    | 4 553/79       | Beta (95% CI)<br><i>ODD subscale</i><br>0.23 (-0.30 to 0.76)<br><i>Anxiety subscale</i><br>0.35 (-0.13 to 0.83) | 0.10 <sup>High</sup><br><br>0.16 <sup>High</sup> |

### iii. Assessment by teachers/others

#### ***Preschool (2-5 years)***

|                 |                                                                                          |        |                                                                                                                |                                                         |      |                                                                                                                                                                                                                                                                                     |                                                                                                                                        |
|-----------------|------------------------------------------------------------------------------------------|--------|----------------------------------------------------------------------------------------------------------------|---------------------------------------------------------|------|-------------------------------------------------------------------------------------------------------------------------------------------------------------------------------------------------------------------------------------------------------------------------------------|----------------------------------------------------------------------------------------------------------------------------------------|
| Misri 2006 [80] | Canada/ Reproductive<br>mental health program<br>at British Columbia<br>Women's Hospital | Cohort | Clonazepam in<br>combination with<br>SSRI/<br>mean duration 137<br>days compared to<br>exposed to SSRI<br>only | Behaviour and emotion-<br>ality/teachers<br><i>CBCL</i> | 22/9 | <i>Internalising</i><br>52.17 (14.16)/53.73 (7.77)<br><i>Somatic complaints</i><br>52.33 (5.72)/52.91 (4.30)<br><i>Withdrawn</i><br>55.33 (5.68)/54.82 (4.67)<br><i>Emotionally reactive</i><br>57.50 (8.19)/54.64 (7.53)<br><i>Anxious/depressed</i><br>59.17 (10.40)/56.64 (7.31) | -0.14 <sup>High</sup><br><br>-0.12 <sup>High</sup><br><br>0.10 <sup>High</sup><br><br>0.37 <sup>High</sup><br><br>0.29 <sup>High</sup> |
|-----------------|------------------------------------------------------------------------------------------|--------|----------------------------------------------------------------------------------------------------------------|---------------------------------------------------------|------|-------------------------------------------------------------------------------------------------------------------------------------------------------------------------------------------------------------------------------------------------------------------------------------|----------------------------------------------------------------------------------------------------------------------------------------|

#### ***School child (6-12 years)***

|                        |                                  |        |                                   |                                   |          |                                                                                                                 |                                                  |
|------------------------|----------------------------------|--------|-----------------------------------|-----------------------------------|----------|-----------------------------------------------------------------------------------------------------------------|--------------------------------------------------|
| Radojčić 2017<br>[111] | The Netherlands/<br>Generation R | Cohort | Benzodiazepi-<br>nes/any duration | Behaviour/teachers<br><i>CBCL</i> | 3 225/62 | Beta (95% CI)<br><i>ODD subscale</i><br>0.37 (-0.07 to 0.82)<br><i>Anxiety subscale</i><br>0.10 (-0.25 to 0.44) | 0.21 <sup>High</sup><br><br>0.07 <sup>High</sup> |
|                        |                                  |        |                                   | Behaviour/parent and              | 5 287/96 | <i>Aggressive behaviour</i>                                                                                     |                                                  |

teacher, *CBCL* 0.75 (-0.28 to 1.77) 0.15<sup>High</sup>

#### *Assessment using medical diagnosis*

|                    |                                                 |                              |                      |                |             |                                    |                      |
|--------------------|-------------------------------------------------|------------------------------|----------------------|----------------|-------------|------------------------------------|----------------------|
| Figueroa 2010 [56] | USA/MarketScan claims data                      | Cohort, registry based       | Benzodiazepines, any | ADHD/diagnosis | 36 925/31 1 | OR (95% CI)<br>1.82 (0.86 to 3.85) | 0.33 <sup>High</sup> |
| Janecka 2018 [72]  | Israel/Meuhedet health maintenance organisation | Case-control, registry based | Lithium/any          | ASD            | 1 426/21    | HR (95% CI)<br>4.23 (0.58 to 30.9) | 0.82 <sup>High</sup> |

Reference numbers in brackets refer to the reference list in the article.

\* Effect sizes (Cohen's d) were calculated using the metaeff package (1) for Stata (2).<sup>High</sup> indicates that higher/more positive values mean a higher risk among the exposed. For the remaining values, a higher value means lower risk among the exposed. Traditionally, a Cohen's d with an absolute value of 0.2 is considered a small effect, 0.5 a medium effect and 0.8 or above a large effect.(3) Only results for the oldest age band are presented here, if a paper had assessed children at multiple time points using the same outcome measure.

† Not enough information to calculate Cohen's d.

ADHD: Attention Deficit Hyperactivity Disorder, BRIEF: Behaviour Rating Inventory of Executive Function, ASQ: Ages and Stages Questionnaire, BSID: Bayley Scales of Infant Development, CBCL: Child Behaviour Checklist, CPRS:R: Conners' Parent Rating Scale, revised, DAS: Differential ability scales, MoBa: Norwegian Mother and Child Cohort, ODD: Oppositional defiant disorder, RCT: Randomised controlled trial, SDQ: Strengths and Difficulties Questionnaire, TIS: Teratogen information service, WISC: Wechsler Intelligence Scale for Children.

#### **References:**

1. Kontopantelis E, Reeves D. METAEFF: Stata module to perform effect sizes calculations for meta-analyses [Internet]. 2011 [cited 2018 Jul 6]. Available from: <http://EconPapers.repec.org/RePEc:boc:bocode:s457072>
2. StataCorp. Stata Statistical Software: Release 15. College Station, TX: StataCorp LP; 2017.
3. Fritz CO, Morris PE, Richler JJ. Effect size estimates: Current use, calculations, and interpretation. J Exp Psychol Gen. 2012;141(1):2–18.
