# Supplementary material for: Use and validity of child neurodevelopment outcome measures in studies on prenatal exposure to psychotropic and analgesic medications – A systematic review
Source: PLOS journal article supplement (doi:10.1371/journal.pone.0219778), 2019-07-11
Supplement: S9 (10.1371/journal.pone.0219778.s009) [file journal.pone.0219778.s009]

**S6 Table: Risk of bias assessment, papers on psychotropics except antidepressants.**

| Reference                                        | Exposure                                    | Outcome measure                           | Risk of bias assessment by outcome Strengths                                     | Limitations                                                                                                                                                                                    |
|--------------------------------------------------|---------------------------------------------|-------------------------------------------|----------------------------------------------------------------------------------|------------------------------------------------------------------------------------------------------------------------------------------------------------------------------------------------|
| <b>Assessment using psychometric instruments</b> |                                             |                                           |                                                                                  |                                                                                                                                                                                                |
| <b>i Assessment by health care professionals</b> |                                             |                                           |                                                                                  |                                                                                                                                                                                                |
| <i>Infant (&lt;2 years)</i>                      |                                             |                                           |                                                                                  |                                                                                                                                                                                                |
| Platt 1989 [114]                                 | Antipsychotics                              | BSID                                      | Appropriate eligibility criteria<br>High rate of follow-up                       | Unclear whether assessment was blinded<br>Conditioned only on parity<br>Not mentioned how missing data were handled                                                                            |
| Peng 2013 [113]                                  | Antipsychotics                              | BSID-III                                  | Appropriate eligibility criteria<br>Blinded assessment<br>High rate of follow-up | Conditioned on few, but not all, important confounders<br>Not mentioned how missing data on covariates were handled                                                                            |
| Johnson 2012 [73]                                | Antipsychotics                              | Infant Neurological International Battery | Blinded assessment<br>High rate of follow-up                                     | Exposed were recruited in pregnancy, unexposed were recruited in pregnancy and post partum<br>Conditioned on some, but not all, important confounders<br>Unclear how missing data were handled |
| Mortensen 2003 [81]                              | Antipsychotics , anxiolytics                | Boel test                                 | Appropriate eligibility criteria<br>High rate of follow-up                       | Assessment not blinded<br>Conditioned on intermediates, but few confounders<br>Not mentioned how missing data were handled                                                                     |
| Oberlander 2004 [87]                             | Anxiolytics (clonazepam combined with SSRI) | BSID-II                                   | High rate of follow-up<br>No missing data                                        | Exposed were recruited in pregnancy and post partum, unexposed were only recruited post partum<br>Unclear whether assessment were blinded                                                      |
| Reebye 2002                                      | Anxiolytics                                 | BSID-II                                   | High rate of follow-up                                                           | No conditioning on confounders<br>Exposed were recruited in pregnancy and                                                                                                                      |

|                        |                                             |                                                                        |                                                                                                     |                                                                                                                                                                             |
|------------------------|---------------------------------------------|------------------------------------------------------------------------|-----------------------------------------------------------------------------------------------------|-----------------------------------------------------------------------------------------------------------------------------------------------------------------------------|
| [92]                   | (clonazepam combined with SSRI)             |                                                                        | No missing data                                                                                     | post partum, unexposed were only recruited post partum<br>Unclear whether assessment was blinded<br>No conditioning on confounders                                          |
| Reebye 2012 [38]       | Anxiolytics (clonazepam combined with SSRI) | BSID-II                                                                | High rate of follow-up<br>No missing data                                                           | Exposed were recruited in pregnancy and post partum, unexposed were only recruited post partum<br>Unclear whether assessment was blinded<br>No conditioning on confounders  |
| Viggedal 1993 [40]     | Anxiolytics                                 | Griffiths' mental development scale I<br>Neuropsychological assessment | Appropriate eligibility criteria<br>Blinded assessment<br>High rate of follow-up<br>No missing data | No conditioning on confounders                                                                                                                                              |
| Gidai 2008a [105]      | Anxiolytics (alprazolam)                    | Hungarian development test<br>Behavioural style questionnaire          | High rate of follow-up<br>No missing data                                                           | Unexposed were siblings of exposed, but the statistical analysis did not take this into account<br>Unclear whether assessment was blinded<br>No conditioning on confounders |
| Gidai 2008b [106]      | Anxiolytics (medazepam)                     | Hungarian development test<br>Behavioural style questionnaire          | High rate of follow-up<br>No missing data                                                           | Unexposed were siblings of exposed, but the statistical analysis did not take this into account<br>Unclear whether assessment was blinded<br>No conditioning on confounders |
| Gidai 2008c [107]      | Anxiolytics (chlordiazepoxide)              | Hungarian development test<br>Behavioural style questionnaire          | High rate of follow-up<br>No missing data                                                           | Unexposed were siblings of exposed, but the statistical analysis did not take this into account<br>Unclear whether assessment was blinded<br>No conditioning on confounders |
| Timmermann 2008b [112] | Anxiolytics (meprobamate)                   | Hungarian development test<br>Behavioural style questionnaire          | High rate of follow-up<br>No missing data                                                           | Unexposed were siblings of exposed, but the statistical analysis did not take this into account<br>Unclear whether assessment was blinded                                   |

|                                     |                                                           |                                                                     |                                                                                         |                                                                                                                                                                                                                                                            |
|-------------------------------------|-----------------------------------------------------------|---------------------------------------------------------------------|-----------------------------------------------------------------------------------------|------------------------------------------------------------------------------------------------------------------------------------------------------------------------------------------------------------------------------------------------------------|
| Laegreid<br>1992 [108]              | Anxiolytics                                               | Touwen Neurologic<br>Assessment, Clinical<br>neurologic assessment  | Appropriate eligibility criteria<br>High rate of follow-up<br>No missing data           | No conditioning on confounders<br>Assessment not blinded<br>No conditioning on confounders                                                                                                                                                                 |
| Petik 2008a<br>[115]                | Hypnotics<br>(glutethimide)                               | Hungarian development<br>test<br>Behavioural style<br>questionnaire | High rate of follow-up<br>No missing data                                               | Unexposed were siblings of exposed, but<br>the statistical analysis did not take this into<br>account<br>Unclear whether assessment was blinded<br>No conditioning on confounders                                                                          |
| Petik 2008b<br>[116]                | Hypnotics<br>(Amobarbital)                                | Hungarian development<br>test<br>Behavioural style<br>questionnaire | High rate of follow-up for Hungarian<br>development test<br>No missing data             | Unexposed were siblings of exposed, but<br>the statistical analysis did not take this into<br>account<br>Unclear whether assessment was blinded<br>No conditioning on confounders<br>High rate of loss to follow-up for<br>Behavioural style questionnaire |
| Timmermann<br>2008a [117]           | Hypnotics<br>(barbital,<br>hexobarbital,<br>butobarbital) | Hungarian development<br>test<br>Behavioural style<br>questionnaire | High rate of follow-up for Hungarian<br>development test<br>No missing data             | Unexposed were siblings of exposed, but<br>the statistical analysis did not take this into<br>account<br>Unclear whether assessment was blinded<br>No conditioning on confounders<br>High rate of loss to follow-up for<br>Behavioural style questionnaire |
| <b><i>Preschool (2-5 years)</i></b> |                                                           |                                                                     |                                                                                         |                                                                                                                                                                                                                                                            |
| Hurault-<br>Delarue 2016<br>[69]    | Antipsychotics<br>, anxiolytics<br>and hypnotics          | Compulsory medical<br>exam                                          | Appropriate eligibility criteria<br>High rate of follow-up                              | Unclear whether assessment was blinded<br>Conditioned on intermediates, but few<br>confounders<br>Not mentioned how missing data were<br>handled                                                                                                           |
| Schechter<br>2017 [94]              | Antipsychotics<br>, anxiolytics,<br>hypnotics             | DAS                                                                 | Appropriate eligibility criteria<br>Blinded assessment<br>Conditioned on many important | Not mentioned how missing data were<br>handled                                                                                                                                                                                                             |

|                                  |                                                      |                                               |                                                                                                     |                                                                                                                                                                  |
|----------------------------------|------------------------------------------------------|-----------------------------------------------|-----------------------------------------------------------------------------------------------------|------------------------------------------------------------------------------------------------------------------------------------------------------------------|
| Hartz 1975<br>[35]               | Anxiolytics<br>(meprobamate,<br>chlordiazepoxide)    | Stanford Binet<br>Intelligence Scale          | confounders<br>High rate of follow-up<br>Appropriate eligibility criteria<br>High rate of follow-up | Unclear whether assessment was blinded<br>Conditioned on few, but not all, important<br>confounders<br>Not mentioned how missing data were<br>handled            |
| Mattson<br>2002 [79]             | Anxiolytics                                          | WPPSI-R                                       | Appropriate eligibility criteria<br>Blinded assessment<br>High rate of follow-up<br>No missing data | Conditioned on a few, but not all, important<br>confounders                                                                                                      |
| <i>School child (6-12 years)</i> |                                                      |                                               |                                                                                                     |                                                                                                                                                                  |
| Platt 1989<br>[114]              | Antipsychotic                                        | Paediatric neurologic<br>assessment           | Appropriate eligibility criteria<br>High rate of follow-up                                          | Unclear whether assessment was blinded<br>Conditioned only on parity<br>Not mentioned how missing data were<br>handled                                           |
| <i>Adolescent (13-18 years)</i>  |                                                      |                                               |                                                                                                     |                                                                                                                                                                  |
| Mattson<br>2002 [79]             | Anxiolytics                                          | WISC-III                                      | Appropriate eligibility criteria<br>Blinded assessment<br>High rate of follow-up<br>No missing data | Conditioned on a few, but not all, important<br>confounders                                                                                                      |
| <b>ii Assessment by parents</b>  |                                                      |                                               |                                                                                                     |                                                                                                                                                                  |
| <i>Infant (&lt;2 years)</i>      |                                                      |                                               |                                                                                                     |                                                                                                                                                                  |
| Reebye 2002<br>[92]              | Anxiolytics<br>(clonazepam<br>combined with<br>SSRI) | Early Infancy<br>Temperament<br>Questionnaire | High rate of follow-up<br>No missing data                                                           | Exposed were recruited in pregnancy and<br>post partum, unexposed were only recruited<br>post partum<br>Assessment not blinded<br>No conditioning on confounders |
| <i>Preschool (2-5 years)</i>     |                                                      |                                               |                                                                                                     |                                                                                                                                                                  |
| Lupattelli<br>2019 [109]         | Anxiolytics,<br>hypnotics                            | ASQ, CPRS-R                                   | Appropriate eligibility criteria<br>Conditioned on many important<br>confounders and used negative  | Assessment not blinded                                                                                                                                           |

|                                                         |                                             |                                                                |                                                                                                                                                                         |                                                                                                                                                                                       |
|---------------------------------------------------------|---------------------------------------------|----------------------------------------------------------------|-------------------------------------------------------------------------------------------------------------------------------------------------------------------------|---------------------------------------------------------------------------------------------------------------------------------------------------------------------------------------|
|                                                         |                                             |                                                                | controls<br>High rate of loss to follow-up, but the authors used inverse probability of censoring weights to handle this<br>Missing data handled by multiple imputation |                                                                                                                                                                                       |
| Brandlistuen 2017 [104]                                 | Anxiolytics, hypnotics                      | CBCL (shortened)                                               | Appropriate eligibility criteria<br>Conditioned on many important confounders and used sibling analysis                                                                 | Assessment not blinded<br>High rate of loss follow-up<br>Not mentioned how missing data were handled                                                                                  |
| Misri 2006 [80]                                         | Anxiolytics (clonazepam combined with SSRI) | CBCL                                                           | No missing data                                                                                                                                                         | Exposed were recruited in pregnancy, unexposed were recruited post partum<br>Assessment not blinded<br>No conditioning on confounding<br>High and differential rate of loss follow-up |
| Odsbu 2015 [110]                                        | Anxiolytics                                 | Intelligibility/Complexity of 3-year-old Children's Utterances | Appropriate eligibility criteria<br>Conditioned on many important confounders and used negative controls                                                                | Assessment not blinded<br>High rate of loss follow-up<br>Not mentioned how missing data were handled                                                                                  |
| <i>School child (6-12 years)</i><br>Radojčić 2017 [111] | Anxiolytics                                 | CBCL                                                           | Appropriate eligibility criteria<br>Conditioned on many important confounders<br>Missing data handled by multiple imputation                                            | Assessment not blinded<br>Rate of loss to follow-up unclear                                                                                                                           |

### iii Assessment by teachers/others

#### *Preschool (2-5 years)*

|                 |                                             |      |                 |                                                                                                                                                                                      |
|-----------------|---------------------------------------------|------|-----------------|--------------------------------------------------------------------------------------------------------------------------------------------------------------------------------------|
| Misri 2006 [80] | Anxiolytics (clonazepam combined with SSRI) | CBCL | No missing data | Exposed were recruited in pregnancy, unexposed were recruited post partum<br>Unclear whether assessment was blinded<br>No conditioning on confounding<br>High rate of loss follow-up |
|-----------------|---------------------------------------------|------|-----------------|--------------------------------------------------------------------------------------------------------------------------------------------------------------------------------------|

***School child (6-12 years)***

|                                           |             |      |                                                                                                                                    |                                                                                                                                                    |
|-------------------------------------------|-------------|------|------------------------------------------------------------------------------------------------------------------------------------|----------------------------------------------------------------------------------------------------------------------------------------------------|
| Radojčić<br>2017 [111]                    | Anxiolytics | CBCL | Appropriate eligibility criteria<br>Conditioned on many important<br>confounders<br>Missing data handled by multiple<br>imputation | Unclear whether assessment was blinded<br>Rate of loss to follow-up unclear                                                                        |
| <b>Assessment using medical diagnosis</b> |             |      |                                                                                                                                    |                                                                                                                                                    |
| Figueroa<br>2010 [56]                     | Anxiolytics | ADHD | Appropriate eligibility criteria<br>Conditioned on many important<br>confounders<br>High rate of follow-up                         | Detection bias cannot be ruled out<br>Not mentioned how missing data were<br>handled                                                               |
| Janecka 2018<br>[72]                      | Lithium     | ASD  | Appropriate eligibility criteria<br>High rate of follow-up                                                                         | Detection bias cannot be ruled out<br>Conditioned on some, but not all, important<br>confounders<br>Not mentioned how missing data were<br>handled |

Reference numbers in brackets refer to the reference list in the article.

ADHD: Attention Deficit Hyperactivity Disorder, ASD: Autism Spectrum Disorder, ASQ: Ages and Stages Questionnaire, BSID: Bayley Scales of Infant Development, CBCL: Child Behaviour Checklist, CPRS:R: Conners' Parent Rating Scale, revised, DAS: Differential ability scales, NPV: Negative predictive value, PPV: Positive predictive value, WISC: Wechsler Intelligence Scale for Children, WPPSI: Wechsler Preschool and Primary Scale of Intelligence.
